# Supplementary material for: Idiopathic Pulmonary Arterial Hypertension in Paediatrics Represents Still a Serious Challenge: A Case Series Study
Source: MDPI journal article supplement (doi:10.3390/children10030518), 2023-03-06
Supplement: s1 [file s1]

**Table S1.** Clinical, echocardiographic, right heart catheterisation features, and outcome of the idiopathic pulmonary hypertension patients who have been studied

| Patient | Gender | Age at first diagnosis | NYHA functional class at diagnosis | Age at last follow-up | Saturation on room air | Therapy                                              | Echo TAPSE | Echo RVSP | RHC mPAP | RHC mRAP | RHC CI | RHC PVRi | RHC SVO2 | Outcome                                                                              |
|---------|--------|------------------------|------------------------------------|-----------------------|------------------------|------------------------------------------------------|------------|-----------|----------|----------|--------|----------|----------|--------------------------------------------------------------------------------------|
| 1       | F      | 1                      | II                                 | 1                     | 87                     | Sildenafil, Bosentan                                 | 9          | 90        | 62       | 10       | 2      | 22       | 60       | On transplant list                                                                   |
| 2       | M      | 6                      | II                                 | 16                    | 93                     | Sildenafil, Bosentan, Treprostinil                   | 12         | 85        | 107      | 17       | 3.6    | 18.8     | 69       | On transplant list                                                                   |
| 3       | F      | 4                      | II                                 | 13                    | 80                     | Sildenafil, Ambrisentan, Treprostinil                | 13         | 130       | 80       | 13       | 5.3    | 24       | 66       | On transplant list                                                                   |
| 4       | F      | 11                     | IV                                 | 16                    | 88                     | Sildenafil, Bosentan, Epoprostenol (upfront therapy) | 12         | 90        | 82       | 9        | 2      | 23       | 41       | Much improved with therapy (currently NYHA I). Epoprostenol switched to Treprostinil |
| 5       | F      | 5                      | II                                 | 9                     | 93                     | Sildenafil, Bosentan, Epoprostenol                   | 9          | 100       | 41       | 8        | 5.2    | 8.2      | 84       | Lung transplant                                                                      |
| 6       | M      | 17                     | III                                | 17                    | 92                     | No therapy. Addressed straight to lungs transplant   | 16         | 125       | 57       | 16       | 2.8    | 18.8     | 52       | Death while waiting for lung transplant                                              |
| 7       | M      | 11                     | III                                | 13                    | 90                     | Sildenafil, Bosentan, Iloprost                       | 11         | 110       | 51       | 10       | 3.7    | 9.3      | 76       | Death while waiting for lung transplant                                              |
| 8       | M      | 0.1                    | III                                | 15                    | 97                     | Sildenafil, Macitentan                               | 22         | 75        | 48       | 9        | 2.6    | 10.6     | 67       | Small PDA + atrial septostomy + atrial stenting                                      |
| 9       | F      | 0.1                    | IV                                 | 16                    | 93                     | Sildenafil, Bosentan, Epoprostenol                   | 17         | 120       | 50       | 7        | N/A    | 20       | 56       | PDA stenting (reverse Potts shunt)                                                   |
| 10      | F      | 2                      | III                                | 8                     | 95                     | Sildenafil, Bosentan, Epoprostenol                   | N/A        | 85        | 40       | 8        | N/A    | 8.7      | 65       | Transplant assessment                                                                |

**Legends:** M: male; F: female; NYHA: New York Heart Association; TAPSE: tricuspid annular plane systolic excursion; N/A: not acquired; RVSP: right ventricular systolic pressure; RHC: right heart catheterisation; mPAP: mean pulmonary arterial pressure; mRAP: mean right atrial pressure; CI: cardiac index; PVRI: pulmonary vascular resistance; SVO<sub>2</sub>: mixed venous oxygen saturation; PDA: patent ductus arteriosus.
